# Supplementary material
Source: Royal Society of Chemistry journal article supplement (doi:10.1039/d6nj00858e)
Supplement: d6nj00858e1.pdf [file d6nj00858e1.pdf]

Figure S1 shows the mean square displacement (MSD) curves of the surfactant species with different carbon-chain lengths. Linear fitting was performed over the 200–600 ps interval, and the corresponding diffusion coefficients were estimated using Einstein's relation:

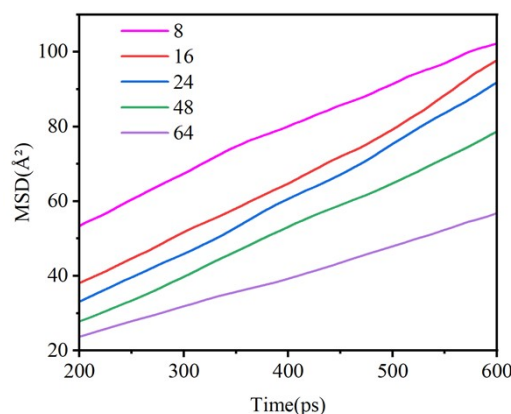

**Fig.S1** Mean Square Displacement (MSD) plots for templates with varying carbon chain lengths

$$D = \frac{1}{6N_{\alpha}} \lim_{t \rightarrow \infty} \frac{d}{dt} \sum_{i=1}^{N_{\alpha}} \langle [r_i(t) - r_i(0)]^2 \rangle$$

where  $r_i(t)$  and  $r_i(0)$  represent the atomic coordinates of molecule  $i$  at time  $t$  and the initial time, respectively. The calculated diffusion coefficients are summarized in Table S1. A decreasing trend in the diffusion coefficient is observed with increasing carbon-chain length, indicating lower relative molecular mobility for longer-chain surfactants under the present simulation conditions. Owing to the limited simulation timescale, these results are discussed only as supplementary qualitative information.

**Table S1:** Self-diffusion coefficients of template agents with different carbon chain lengths

---

| /                                       | 8C     | 16C    | 24C    | 48C    | 64C    |
|-----------------------------------------|--------|--------|--------|--------|--------|
| MSD slope                               | 0.1454 | 0.1216 | 0.1021 | 0.0816 | 0.0652 |
| Self-diffusion                          |        |        |        |        |        |
| coefficient( $\text{\AA}^2/\text{ps}$ ) | 0.0242 | 0.0202 | 0.0170 | 0.0136 | 0.0109 |
| )                                       |        |        |        |        |        |

---
